# Supplementary material for: In Vitro and In Vivo Effect of Amikacin and Imipenem Combinations against Multidrug-Resistant E. coli
Source: MDPI journal article supplement (doi:10.3390/tropicalmed7100281), 2022-10-02
Supplement: s1 [file s1]

## Supplementary Material

**Table S1.** Distribution of resistance pattern of *E. coli* to different antimicrobial agents according to the infection type.

| Antibiotics                    | Wound infections | Ear infections | Burns infections | Chest infections | UTIs | Gastroenteritis | ICU | % Resistant |
|--------------------------------|------------------|----------------|------------------|------------------|------|-----------------|-----|-------------|
| Cefpodoxime                    | 22               | 2              | 4                | 6                | 5    | 6               | 5   | 83.3        |
| Cefadroxil                     | 25               | 3              | 5                | 7                | 6    | 6               | 6   | 96.7        |
| Streptomycin                   | 17               | 3              | 5                | 7                | 6    | 6               | 6   | 83.3        |
| Aztreonam                      | 12               | 1              | 3                | 4                | 6    | 6               | 5   | 61.7        |
| Ceftriaxone                    | 18               | 3              | 5                | 7                | 6    | 6               | 6   | 85          |
| Cephalothin                    | 26               | 3              | 5                | 7                | 6    | 6               | 6   | 98.3        |
| Gentamycin                     | 13               | 1              | 2                | 4                | 3    | 2               | 1   | 43.3        |
| Amoxicillin/<br>Clavulanic     | 27               | 3              | 5                | 7                | 6    | 5               | 6   | 98.3        |
| Ceftazidime                    | 22               | 1              | 5                | 6                | 4    | 6               | 6   | 83.3        |
| Imipenem                       | 22               | 2              | 3                | 6                | 4    | 4               | 4   | 75          |
| Meropenem                      | 11               | 1              | 2                | 2                | 3    | 3               | 3   | 41.7        |
| Cefoperazone                   | 16               | 2              | 4                | 6                | 5    | 6               | 1   | 66.7        |
| Doxycycline                    | 23               | 3              | 4                | 6                | 5    | 6               | 6   | 88.3        |
| Tetracycline                   | 19               | 1              | 2                | 2                | 2    | 2               | 0   | 46.7        |
| Ciprofloxacin                  | 11               | 1              | 2                | 5                | 4    | 5               | 5   | 55          |
| Amikacin                       | 15               | 2              | 4                | 6                | 1    | 2               | 5   | 58.3        |
| Nalidixic acid                 | 14               | 2              | 4                | 7                | 6    | 5               | 6   | 73.3        |
| Cefotaxime                     | 25               | 3              | 4                | 7                | 6    | 6               | 6   | 95          |
| Piperacillin                   | 24               | 3              | 4                | 7                | 5    | 0               | 0   | 71.7        |
| Cefepime                       | 20               | 3              | 4                | 6                | 6    | 5               | 6   | 81.7        |
| Ampicillin/sulbactam           | 26               | 2              | 5                | 6                | 6    | 6               | 6   | 95          |
| Norfloxacin                    | 11               | 3              | 2                | 5                | 3    | 5               | 1   | 50          |
| Tobramycin                     | 14               | 2              | 4                | 1                | 0    | 0               | 1   | 36.7        |
| Sulphamethoxazole/trimethoprim | 22               | 1              | 5                | 7                | 6    | 6               | 6   | 88.3        |
| Nitrofurantoin                 | 13               | 1              | 1                | 4                | 5    | 5               | 4   | 53.3        |
| Chloramphenicol                | 12               | 2              | 4                | 5                | 3    | 2               | 1   | 48.3        |
| Levofloxacin                   | 13               | 2              | 3                | 1                | 0    | 1               | 0   | 33.3        |
| Piperacillin/<br>Tazobactam    | 5                | 2              | 2                | 1                | 2    | 5               | 3   | 33.3        |
| Ofloxacin                      | 11               | 2              | 2                | 3                | 4    | 5               | 2   | 48.3        |
| Azithromycin                   | 16               | 2              | 1                | 5                | 4    | 0               | 1   | 50          |

**Table S2.** Distribution of *bla*<sub>IMP</sub> genotype among 60 isolated *E. coli*.

| <i>E.coli</i> | Source of sample           | Resistance pattern of imipenem |              |            | <i>bla</i> <sub>IMP</sub> |
|---------------|----------------------------|--------------------------------|--------------|------------|---------------------------|
|               |                            | Sensitive                      | Intermediate | Resistance |                           |
| 1.            | Wound                      | +                              | -            | -          | +                         |
| 2.            | Wound                      | -                              | -            | +          | +                         |
| 3.            | Wound                      | -                              | -            | +          | +                         |
| 4.            | Wound                      | -                              | -            | +          | +                         |
| 5.            | Wound                      | +                              | -            | -          | -                         |
| 6.            | Wound                      | -                              | -            | +          | +                         |
| 7.            | Wound                      | -                              | -            | +          | +                         |
| 8.            | Wound                      | -                              | +            | -          | -                         |
| 9.            | Wound                      | +                              | -            | -          | -                         |
| 10.           | Wound                      | -                              | -            | +          | +                         |
| 11.           | Wound                      | -                              | -            | +          | +                         |
| 12.           | Wound                      | -                              | -            | +          | +                         |
| 13.           | Wound                      | -                              | -            | +          | +                         |
| 14.           | Wound                      | -                              | -            | +          | +                         |
| 15.           | Wound                      | +                              | -            | -          | -                         |
| 16.           | Wound                      | -                              | -            | +          | +                         |
| 17.           | Wound                      | -                              | -            | +          | +                         |
| 18.           | Wound                      | -                              | -            | +          | +                         |
| 19.           | Wound                      | -                              | -            | +          | +                         |
| 20.           | Wound                      | -                              | -            | +          | +                         |
| 21.           | Wound                      | -                              | -            | +          | +                         |
| 22.           | Wound                      | -                              | -            | +          | +                         |
| 23.           | Wound                      | -                              | -            | +          | +                         |
| 24.           | Wound                      | -                              | -            | +          | +                         |
| 25.           | Wound                      | -                              | -            | +          | +                         |
| 26.           | Wound                      | -                              | -            | +          | +                         |
| 27.           | Wound                      | -                              | -            | +          | +                         |
| 28.           | Ear infection              | +                              | -            | -          | -                         |
| 29.           | Ear infection              | -                              | -            | +          | +                         |
| 30.           | Ear infection              | -                              | -            | +          | +                         |
| 31.           | Burn                       | +                              | -            | -          | -                         |
| 32.           | Burn                       | -                              | -            | +          | +                         |
| 33.           | Burn                       | -                              | -            | +          | +                         |
| 34.           | Burn                       | +                              | -            | -          | -                         |
| 35.           | Burn                       | -                              | -            | +          | +                         |
| 36.           | Burn                       | -                              | -            | +          | +                         |
| 37.           | Burn                       | -                              | -            | +          | +                         |
| 38.           | Chest infection            | -                              | -            | +          | +                         |
| 39.           | Chest infection            | -                              | -            | +          | +                         |
| 40.           | Chest infection            | +                              | -            | -          | -                         |
| 41.           | Urinary tract<br>Infection | -                              | -            | +          | +                         |
| 42.           | Urinary tract<br>Infection | -                              | -            | +          | +                         |
| 43.           | Urinary tract<br>Infection | +                              | -            | -          | -                         |
| 44.           | Urinary tract<br>Infection | -                              | -            | +          | +                         |
| 45.           | Urinary tract              | -                              | -            | +          | +                         |

|     |                                          |   |   |   |   |
|-----|------------------------------------------|---|---|---|---|
|     | Infection                                |   |   |   |   |
| 46. | Urinary tract Infection                  | - | + | - | + |
| 47. | Urinary tract Infection                  | - | - | + | + |
| 48. | Urinary tract Infection                  | - | - | + | + |
| 49. | Urinary tract Infection                  | - | - | + | + |
| 50. | Urinary tract Infection                  | - | + | - | - |
| 51. | Gastroenteritis                          | - | - | + | + |
| 52. | Gastroenteritis                          | - | - | + | + |
| 53. | Gastroenteritis                          | - | + | - | - |
| 54. | Gastroenteritis                          | - | - | + | + |
| 55. | Gastroenteritis                          | + | - | - | - |
| 56. | Patients admitted to intensive care unit | - | - | + | + |
| 57. | Patients admitted to intensive care unit | - | - | + | + |
| 58. | Patients admitted to intensive care unit | - | + | - | + |
| 59. | Patients admitted to intensive care unit | - | - | + | + |
| 60. | Patients admitted to intensive care unit | - | - | + | + |

**Table S3.** Distribution of *aac(6')-Ib* genotype among 60 isolated *E.coli*.

| <i>E.coli</i> | Source of sample | Resistance pattern of amikacin |              |            | <i>aac(6')-Ib</i> |
|---------------|------------------|--------------------------------|--------------|------------|-------------------|
|               |                  | Sensitive                      | Intermediate | Resistance |                   |
| 1.            | Wound            | -                              | -            | +          | +                 |
| 2.            | Wound            | +                              | -            | -          | +                 |
| 3.            | Wound            | -                              | -            | +          | +                 |
| 4.            | Wound            | +                              | -            | -          | -                 |
| 5.            | Wound            | -                              | -            | +          | +                 |
| 6.            | Wound            | +                              | -            | -          | +                 |
| 7.            | Wound            | -                              | -            | +          | +                 |
| 8.            | Wound            | -                              | -            | +          | +                 |
| 9.            | Wound            | +                              | -            | -          | -                 |
| 10.           | Wound            | -                              | -            | +          | +                 |
| 11.           | Wound            | +                              | -            | -          | -                 |
| 12.           | Wound            | -                              | -            | +          | +                 |
| 13.           | Wound            | -                              | -            | +          | +                 |
| 14.           | Wound            | +                              | -            | -          | -                 |
| 15.           | Wound            | -                              | -            | +          | +                 |
| 16.           | Wound            | +                              | -            | -          | +                 |
| 17.           | Wound            | -                              | -            | +          | +                 |
| 18.           | Wound            | +                              | -            | -          | -                 |
| 19.           | Wound            | -                              | -            | +          | +                 |
| 20.           | Wound            | +                              | -            | -          | -                 |
| 21.           | Wound            | -                              | -            | +          | +                 |
| 22.           | Wound            | +                              | -            | -          | -                 |
| 23.           | Wound            | -                              | -            | +          | +                 |

|     |                                          |   |   |   |   |
|-----|------------------------------------------|---|---|---|---|
| 24. | Wound                                    | + | - | - | + |
| 25. | Wound                                    | - | - | + | + |
| 26. | Wound                                    | + | - | - | - |
| 27. | Wound                                    | - | - | + | + |
| 28. | Ear infection                            | - | - | + | + |
| 29. | Ear infection                            | - | - | + | + |
| 30. | Ear infection                            | + | - | - | - |
| 31. | Burn                                     | - | - | + | + |
| 32. | Burn                                     | - | - | + | + |
| 33. | Burn                                     | + | - | - | - |
| 34. | Burn                                     | - | - | + | + |
| 35. | Burn                                     | - | - | + | + |
| 36. | Burn                                     | - | - | + | + |
| 37. | Burn                                     | - | - | + | + |
| 38. | Chest infection                          | + | - | - | - |
| 39. | Chest infection                          | - | - | + | + |
| 40. | Chest infection                          | - | - | + | + |
| 41. | Urinary tract infection                  | - | - | + | + |
| 42. | Urinary tract Infection                  | - | - | + | + |
| 43. | Urinary tract Infection                  | - | + | - | + |
| 44. | Urinary tract Infection                  | + | - | - | - |
| 45. | Urinary tract Infection                  | - | + | - | - |
| 46. | Urinary tract Infection                  | + | - | - | - |
| 47. | Urinary tract Infection                  | - | - | + | + |
| 48. | Urinary tract Infection                  | - | + | - | - |
| 49. | Urinary tract Infection                  | - | + | - | - |
| 50. | Urinary tract Infection                  | + | - | - | - |
| 51. | Gastroenteritis                          | - | - | + | + |
| 52. | Gastroenteritis                          | - | + | - | - |
| 53. | Gastroenteritis                          | - | - | + | + |
| 54. | Gastroenteritis                          | + | - | - | - |
| 55. | Gastroenteritis                          | - | - | + | + |
| 56. | Patients admitted to intensive care unit | - | - | + | + |
| 57. | Patients admitted to intensive care unit | + | - | + | + |
| 58. | Patients admitted to intensive care unit | - | + | - | - |
| 59. | Patients admitted to intensive care unit | - | - | + | + |
| 60. | Patients admitted to intensive care unit | - | - | + | + |

**Table S4.** Time-killing curve for different groups infected with *E.coli* (wound no.3) resistant to both IMP & AMK .

|                          |      | Control group (I) | Amikacin group (II) | Imipenem group (III) | Combination group (IV) | <i>p</i> value |
|--------------------------|------|-------------------|---------------------|----------------------|------------------------|----------------|
| 0.5 mic<br>concentration | 0 h  | 8.20±0.02         | 8.20±0.02           | 8.20±0.02            | 8.20±0.02              | 1              |
|                          | 2 h  | 9.36±0.01         | 9.35±0.01           | 9.36±0.02            | 9.31±0.01              | <0.001*        |
|                          | 4 h  | 9.47±0.01         | 9.46±0.01           | 9.45±0.02            | 9.24±0.03              | <0.001*        |
|                          | 8 h  | 10.08±0.02        | 10.05±0.02          | 10.05±0.02           | 9.04±0.02              | <0.001*        |
|                          | 12 h | 10.36±0.01        | 10.34±0.01          | 10.34±0              | 8.80±0.09              | <0.001*        |
|                          | 24 h | 10.47±0.01        | 10.47±0             | 10.47±0              | 7.46±0.01              | <0.001*        |
| 1 mic<br>concentration   | 0 h  | 8.20±0.02         | 8.20±0.02           | 8.20±0.02            | 8.20±0.02              | 1              |
|                          | 2 h  | 9.36±0.01         | 9.22±0.02           | 9.25±0.01            | 9.19±0.04              | <0.001*        |
|                          | 4 h  | 9.47±0.01         | 7.18±0.01           | 7.20±0.01            | 7.09±0.01              | <0.001*        |
|                          | 8 h  | 10.08±0.02        | 7.07±0.02           | 7.15±0.02            | 6.97±0.01              | <0.001*        |
|                          | 12 h | 10.36±0.01        | 6.91±0.03           | 6.97±0.02            | 6.87±0.01              | <0.001*        |
|                          | 24 h | 10.47±0.01        | 6.75±0.04           | 6.81±0.03            | 4.7±0.02               | <0.001*        |
| 2 mic<br>concentration   | 0 h  | 8.20±0.02         | 8.20±0.02           | 8.20±0.02            | 8.20±0.02              | 1              |
|                          | 2 h  | 9.36±0.01         | 8.01±0.01           | 8.01±0.01            | 7.98±0.02              | <0.001*        |
|                          | 4 h  | 9.47±0.01         | 7.93±0.01           | 7.95±0.03            | 7.88±0.03              | <0.001*        |
|                          | 8 h  | 10.08±0.02        | 6.72±0.05           | 6.82±0.02            | 6.65±0.04              | <0.001*        |
|                          | 12 h | 10.36±0.01        | 6.64±0.02           | 6.68±0.05            | 5.94±0.03              | <0.001*        |
|                          | 24 h | 10.47±0.01        | 5.53±0.05           | 5.85±0.04            | 4 ±0.04                | <0.001*        |
| 4 mic<br>concentration   | 0 h  | 8.20±0.02         | 8.20±0.02           | 8.20±0.02            | 8.20±0.02              | 1              |
|                          | 2 h  | 9.36±0.01         | 6.87±0.06           | 6.89±0.02            | 6.72±0.05              | <0.001*        |
|                          | 4 h  | 9.47±0.01         | 5.64±0.08           | 5.80±0.01            | 4.60±0.04              | <0.001*        |
|                          | 8 h  | 10.08±0.02        | 4.50±0.03           | 4.63±0.03            | 0±0                    | <0.001*        |
|                          | 12 h | 10.36±0.01        | 0±0                 | 0±0                  | 0±0                    | <0.001*        |
|                          | 24 h | 10.47±0.01        | 0±0                 | 0±0                  | 0±0                    | <0.001*        |

\* Significant p-value: <0.001.

**Table S5.** Time-kill studies for different groups infected with imipenem resistant *E. Coli* (W2).

|                          |      | Control group (I) | Amikacin group (II) | Imipenem group (III) | Combination group (IV) | <i>p</i> value |
|--------------------------|------|-------------------|---------------------|----------------------|------------------------|----------------|
| 0.5 mic<br>concentration | 0 h  | 8.20±0.02         | 8.20±0.02           | 8.20±0.02            | 8.20±0.02              | 1              |
|                          | 2 h  | 9.36±0.01         | 6.79±0.04           | 9.01±0.01            | 8.92±0.03              | <0.001*        |
|                          | 4 h  | 9.47±0.01         | 5.61±0.07           | 9.06±0.01            | 8.71±0.06              | <0.001*        |
|                          | 8 h  | 10.08±0.02        | 5.58±0.06           | 9.10±0.01            | 8.02±0.01              | <0.001*        |
|                          | 12 h | 10.36±0.01        | 4.64±0.07           | 9.22±0               | 8.26±0.01              | <0.001*        |
|                          | 24 h | 10.47±0.01        | 4.50±0.01           | 10.2±0.01            | 8.09±0.01              | <0.001*        |
| 1 mic<br>concentration   | 0 h  | 8.20±0.02         | 8.20±0.02           | 8.20±0.02            | 8.20±0.02              | 1              |
|                          | 2 h  | 9.36±0.01         | 6.25±1.22           | 8.95±0.02            | 6.87±0.02              | <0.001*        |
|                          | 4 h  | 9.47±0.01         | 5.86±0.01           | 8.70±0.05            | 6.53±0.02              | <0.001*        |
|                          | 8 h  | 10.08±0.02        | 4.52±0.02           | 7.90±0.03            | 5.78±0.03              | <0.001*        |
|                          | 12 h | 10.36±0.01        | 0±0                 | 6.69±0.04            | 5.49±0.01              | <0.001*        |
|                          | 24 h | 10.47±0.01        | 0±0                 | 6±0.02               | 4±0.03                 | <0.001*        |

\* Significant p-value: &lt;0.001.

**Table S6.** Time-kill studies for different groups infected with amikacin resistant *E. Coli* (W1).

|                          |      | Control group (I) | Amikacin group (II) | Imipenem group (III) | Combination group (IV) | <i>p</i> value |
|--------------------------|------|-------------------|---------------------|----------------------|------------------------|----------------|
| 0.5 mic<br>concentration | 0 h  | 8.20±0.02         | 8.20±0.02           | 8.20±0.02            | 8.20±0.02              | 1              |
|                          | 2 h  | 9.36±0.01         | 9.28±0.01           | 6.69±0.04            | 9.25±0.02              | <0.001*        |
|                          | 4 h  | 9.47±0.01         | 9.32±0.01           | 5.72±0.06            | 9.21±0                 | <0.001*        |
|                          | 8 h  | 10.08±0.02        | 9.45±0.01           | 5.48±0.01            | 9.01±0.01              | <0.001*        |
|                          | 12 h | 10.36±0.01        | 9.31±0.41           | 4.72±0.05            | 8.88±0.01              | <0.001*        |
|                          | 24 h | 10.47±0.01        | 10.01±0.01          | 4.51±0.03            | 8.03±0.02              | <0.001*        |
| 1 mic<br>concentration   | 0 h  | 8.20±0.02         | 8.20±0.02           | 8.20±0.02            | 8.20±0.02              | 1              |
|                          | 2 h  | 9.36±0.01         | 7.95±0.02           | 5.58±0.05            | 6.93±0.01              | <0.001*        |
|                          | 4 h  | 9.47±0.01         | 7.67±0.03           | 4.59±0.07            | 6.60±0.04              | <0.001*        |
|                          | 8 h  | 10.08±0.02        | 6.85±0.03           | 0±0                  | 5.87±0.03              | <0.001*        |
|                          | 12 h | 10.36±0.01        | 6.52±0.03           | 0±0                  | 5.50±0.03              | <0.001*        |
|                          | 24 h | 10.47±0.01        | 6±0.02              | 0±0                  | 4±0.04                 | <0.001*        |

\* Significant p-value: &lt;0.001.

## In-vivo studies

**Table S7.** Average blood bacterial count of *E. coli* isolated from untreated animals and animals treated with imipenem, amikacin, and combination at different time.

| Organism       | Time | Untreated (I) | Imipenem (II) | Amikacin (III) | Combination (IV) | <i>p</i> value |
|----------------|------|---------------|---------------|----------------|------------------|----------------|
| <i>E. coli</i> | 3h   | 9.41±0.01     | 9.34±0.01     | 9.28±0.01      | 9.11±0.02        | <0.001*        |
|                | 11h  | 10.29±0.02    | 9.05±0.02     | 8.84±0.05      | 8.13±0.03        | <0.001*        |
|                | 27h  | 10.36±0.01    | 8.71±0.06     | 8.25±0.01      | 6.0±0.52         | <0.001*        |

*p* values between different times.

|             | 3h vs 11h | 3h vs 27h | 11h vs 27h |
|-------------|-----------|-----------|------------|
| Untreated   | <0.001*   | <0.001*   | <0.001*    |
| Imipenem    | <0.001*   | <0.001*   | <0.001*    |
| Amikacin    | <0.001*   | <0.001*   | <0.001*    |
| Combination | <0.001*   | <0.001*   | <0.001*    |

**Table S8.** Gene expression of resistant *E. coli* after treatment.

| <i>E. coli</i><br>Isolate No. | 16S rRNA | <i>bla</i> -IMP | <i>aac</i> (6')-Ib |       |             |
|-------------------------------|----------|-----------------|--------------------|-------|-------------|
|                               | CT       | CT              | Fold change        | CT    | Fold change |
| E1 (Control)                  | 20.57    | 22.38           | -                  | 23.04 | -           |
| E2                            | 19.88    | 18.49           | 9.1896             | 19.73 | 6.1475      |
| E3                            | 20.31    |                 | Nd                 | 19.31 | 11.0809     |
| E4                            | 20.16    | 18.19           | 13.7370            |       | Nd          |
| E5                            | 19.54    | 19.53           | 3.5328             | 19.60 | 5.3147      |
| E6                            | 20.20    | 19.50           | 5.6962             | 21.23 | 2.7132      |

E1: Control.

E2: *E. coli* (w3) resistant for amikacin harboring *aac*(6')-Ib and imipenem harboring *bla*<sub>IMP</sub>

E3: *E. coli* (W1) resistant to amikacin harboring *aac*(6')-Ib only.

E4: *E. coli* (W2) resistant to imipenem harboring *bla*<sub>IMP</sub> only.

E5: *E. coli* isolate (w3) after treatment with 0.25MIC of amikacin+0.5MIC of imipenem.

E6: *E. coli* isolate (w3) after treatment with 0.25MIC of imipenem+0.5MIC of amikacin.
